# Supplementary material
Source: Springer Nature journal article supplement (https://www.springermedizin.de/resource/supplementary/12948_2011_102_MOESM3_ESM.pdf/9556910)

**>5 years of age**

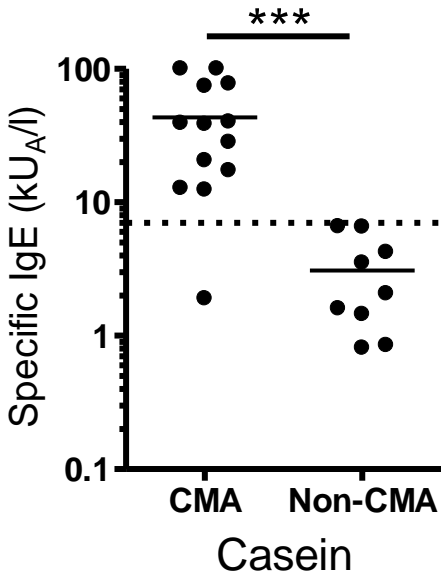

Supplement: MOESM3 [file 9556910]
